# Supplementary material
Source: PubMed Central journal article supplement (PMC4186646)
Supplement: Supp_Fig1.pdf [file Supp_Fig1.pdf]

## Supplementary Data

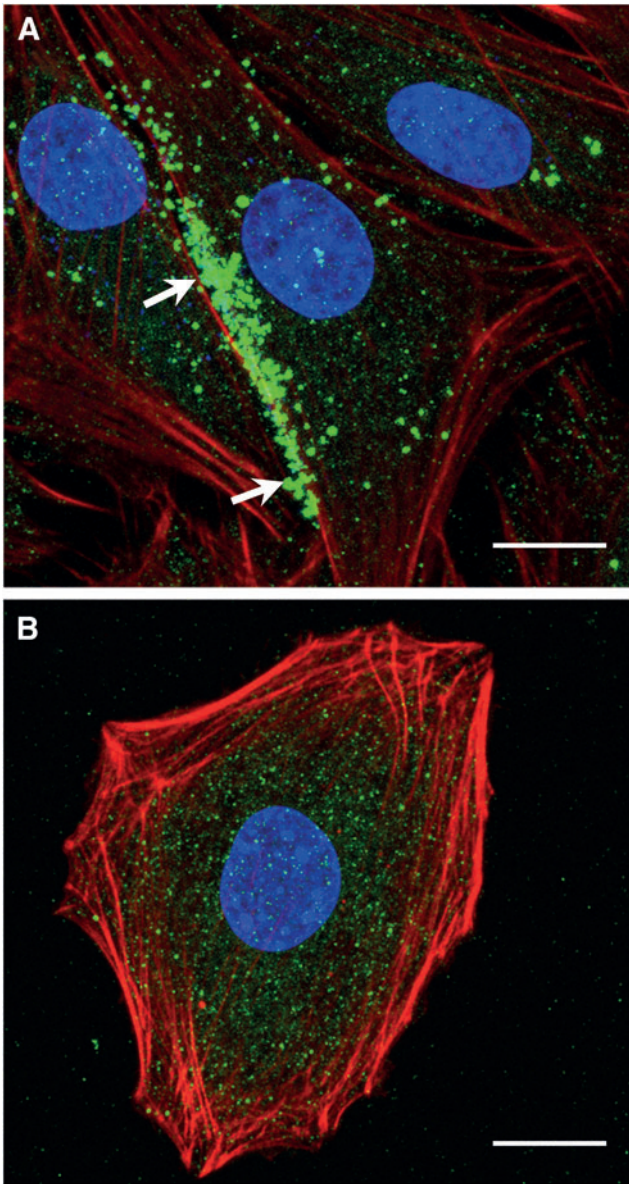

**SUPPLEMENTARY FIG. S1.** Immunofluorescent confocal microscopy showing endogenous C12orf29 expression in sheep periodontal ligament and MC3T3-E1 cells. **(A)** Cells isolated from the periodontium of sheep show high expression of C12orf29 in the cytosol. The concentration is particularly strong along a ridge near the cell surface indicated by arrows. This feature is indicative of accumulation in the endoplasmic reticulum and that the protein is being exported out of the cells. **(B)** A MC3T3-E1 cell showing high C12orf29 expression in a punctate pattern within the cytosol. Scale bars = 20  $\mu\text{m}$ .
